# Supplementary material
Source: publisher figshare collection journal article supplement (https://tandf.figshare.com/ndownloader/files/13585115)
Supplement: Supplementary file 1 [file 13585115]

**Supplementary Table**

Table S1. Summary of where each of the five *Gymnogryllus* species were found and the sample sizes for acoustic and specimen data. The number of song refers to the number of recording, with each recording belonging to a unique cricket individual. The number of specimen here refers to the number of cricket collected for the morphometric analysis and dissected for genitalia examination.

| Species | Locality | GPS coordinates | Source | Song | Specimens |
| --- | --- | --- | --- | --- | --- |
| *G. angustus* | Indonesia (West Java) | S6.6, E106.78 | SI | N=4 | N=1 |
| *G. leucostictus* | Peninsular Malaysia | N3.7, E101.74 | MKT | N=2 | N=1 |
| *G. malayanus* | Singapore | N1.3, E103.78 | MKT | N=6 | N=3 |
| *G. sylvestris* | Singapore | N1.3, E103.78 | MKT | N=5 | N=3 |
| *G. unexpectus* | Brunei Darussalam | N4.5, E115.15 | MKT, CYHY, HHAS, and PMJ | N=4 | N=3 |
